# Supplementary material
Source: PubMed Central journal article supplement (PMC7583332)
Supplement: Supp_Table1.pdf [file Supp_Table1.pdf]

## Supplementary Data

SUPPLEMENTARY TABLE S1. THYROID FINE NEEDLE ASPIRATE IMMUNOPHENOTYPING DATA COMPARING IMMUNE CHECKPOINT INHIBITOR THYROIDITIS SAMPLES COLLECTED WITHIN TWO WEEKS OF DIAGNOSIS AND HEALTHY THYROID SAMPLES

| <i>Immune cell profile<br/>(% of WBCs)</i>      | <i>ICI-induced<br/>thyroiditis<br/>at diagnosis (n=8)</i> | <i>Healthy<br/>volunteers<br/>(n=5)</i> | <i>Difference<br/>of means</i> | <i>p-value<br/>(t-test)</i> | <i>ICI-induced<br/>thyroiditis 2 months<br/>later (n=1)</i> |
|-------------------------------------------------|-----------------------------------------------------------|-----------------------------------------|--------------------------------|-----------------------------|-------------------------------------------------------------|
| WBCs (% of all cells)                           | 5.90                                                      | 0.52                                    | 5.34                           | 0.285                       | 1.54                                                        |
| Granulocytes                                    | 6.22                                                      | 15.73                                   | -9.51                          | 0.004                       | 44.65                                                       |
| Mononuclear cells                               | 93.84                                                     | 84.32                                   | 9.518                          | 0.004                       | 15.55                                                       |
| Lymphocytes                                     | 81.23                                                     | 74.50                                   | 6.729                          | 0.192                       | 14.05                                                       |
| CD3 <sup>+</sup> T lymphocytes                  | 61.30                                                     | 20.10                                   | 41.20                          | 0.00006                     | 4.27                                                        |
| CD4 <sup>+</sup> T lymphocytes                  | 34.52                                                     | 13.19                                   | 21.33                          | 0.005                       | 1.26                                                        |
| CD8 <sup>+</sup> T lymphocytes                  | 23.21                                                     | 5.07                                    | 18.14                          | 0.00006                     | 1.29                                                        |
| CD4 <sup>-</sup> CD8 <sup>-</sup> T lymphocytes | 1.89                                                      | 0.72                                    | 1.174                          | 0.006                       | 0.11                                                        |
| CD19 <sup>+</sup> B lymphocytes                 | 9.59                                                      | 26.72                                   | -17.13                         | 0.007                       | 1.33                                                        |
| CD16 <sup>+</sup> CD56 <sup>+</sup> NK cells    | 0.48                                                      | 0.31                                    | 0.17                           | 0.760                       | 0                                                           |
| CD16 <sup>-</sup> CD56 <sup>+</sup> NK cells    | 0.25                                                      | 0.23                                    | 0.02                           | 0.932                       | 0.01                                                        |
| CD16 <sup>+</sup> CD56 <sup>-</sup> cells       | 0.31                                                      | 0.43                                    | -0.12                          | 0.589                       | 0.01                                                        |
| Monocytes                                       | 2.62                                                      | 5.09                                    | -2.47                          | 0.097                       | 0.81                                                        |
| Classical monocytes                             | 1.63                                                      | 2.89                                    | -1.26                          | 0.288                       | 0.46                                                        |
| Intermediate monocytes                          | 0.49                                                      | 1.32                                    | -0.83                          | 0.068                       | 0.23                                                        |
| Nonclassical monocytes                          | 0.24                                                      | 0.82                                    | -0.58                          | 0.060                       | 0.05                                                        |

ICI, immune checkpoint inhibitor; WBC, white blood cell.
