# Supplementary material
Source: PubMed Central journal article supplement (PMC7583332)
Supplement: Supp_Tables2-3.pdf [file Supp_Tables2-3.pdf]

SUPPLEMENTARY TABLE S2. THYROID FINE NEEDLE ASPIRATE IMMUNOPHENOTYPING FOR FURTHER T LYMPHOCYTE ANALYSIS COMPARING IMMUNE CHECKPOINT INHIBITOR THYROIDITIS SAMPLES COLLECTED WITHIN TWO WEEKS OF DIAGNOSIS AND HEALTHY THYROID SAMPLES

| <i>Immune cell profile<br/>(% of T lymphocytes)</i>   | <i>ICI-induced<br/>thyroiditis at<br/>diagnosis (n=6)</i> | <i>Healthy<br/>volunteers<br/>(n=3)</i> | <i>Difference<br/>of means</i> | <i>p-value<br/>(t-test)</i> |
|-------------------------------------------------------|-----------------------------------------------------------|-----------------------------------------|--------------------------------|-----------------------------|
| CD4 <sup>+</sup> CTLA4 <sup>+</sup>                   | 4.07                                                      | 27.35                                   | -23.28                         | 0.072                       |
| CD4 <sup>+</sup> CTLA4 <sup>+</sup> CD28 <sup>+</sup> | 19.16                                                     | 6.92                                    | 12.24                          | 0.169                       |
| CD4 <sup>+</sup> CD28 <sup>+</sup>                    | 68.07                                                     | 58.02                                   | 10.06                          | 0.617                       |
| CD8 <sup>+</sup> CTLA4 <sup>+</sup>                   | 4.46                                                      | 4.23                                    | 0.23                           | 0.961                       |
| CD8 <sup>+</sup> CTLA4 <sup>+</sup> CD28 <sup>+</sup> | 18.03                                                     | 23.26                                   | -5.23                          | 0.672                       |
| CD8 <sup>+</sup> CD28 <sup>+</sup>                    | 64.75                                                     | 60.34                                   | 4.41                           | 0.776                       |
| CD4 <sup>+</sup> PD1 <sup>+</sup>                     | 42.79                                                     | 42.99                                   | -0.20                          | 0.989                       |
| CD8 <sup>+</sup> PD1 <sup>+</sup>                     | 43.70                                                     | 56.01                                   | -12.31                         | 0.509                       |
| CD4 <sup>+</sup> CD154 <sup>+</sup>                   | 1.25                                                      | 4.78                                    | -3.52                          | 0.005                       |
| CD8 <sup>+</sup> CD154 <sup>+</sup>                   | 0.24                                                      | 0                                       | 0.24                           | 0.332                       |
| CD4 <sup>+</sup> CD56 <sup>+</sup>                    | 9.94                                                      | 33.81                                   | -23.87                         | 0.016                       |
| CD8 <sup>+</sup> CD56 <sup>+</sup>                    | 8.38                                                      | 14.85                                   | -6.47                          | 0.325                       |
| CD4 <sup>+</sup> CD28 <sup>-</sup> PD1 <sup>-</sup>   | 4.88                                                      | 11.20                                   | -6.32                          | 0.281                       |
| CD4 <sup>+</sup> CD28 <sup>-</sup> PD1 <sup>+</sup>   | 4.88                                                      | 25.05                                   | -20.17                         | 0.094                       |
| CD4 <sup>+</sup> CD28 <sup>+</sup> PD1 <sup>-</sup>   | 51.06                                                     | 44.74                                   | 6.31                           | 0.730                       |
| CD4 <sup>+</sup> CD28 <sup>+</sup> PD1 <sup>+</sup>   | 39.19                                                     | 19.01                                   | 20.17                          | 0.125                       |
| CD8 <sup>+</sup> CD28 <sup>-</sup> PD1 <sup>-</sup>   | 11.40                                                     | 9.12                                    | 2.28                           | 0.637                       |
| CD8 <sup>+</sup> CD28 <sup>-</sup> PD1 <sup>+</sup>   | 5.46                                                      | 7.27                                    | -1.80                          | 0.610                       |
| CD8 <sup>+</sup> CD28 <sup>+</sup> PD1 <sup>-</sup>   | 47.15                                                     | 36.12                                   | 11.03                          | 0.463                       |
| CD8 <sup>+</sup> CD28 <sup>+</sup> PD1 <sup>+</sup>   | 35.98                                                     | 47.48                                   | -11.50                         | 0.499                       |
| CD4 <sup>+</sup> CD28 <sup>+</sup> CD56 <sup>-</sup>  | 85.70                                                     | 54.21                                   | 31.49                          | 0.064                       |
| CD4 <sup>+</sup> CD28 <sup>+</sup> CD56 <sup>+</sup>  | 2.74                                                      | 7.70                                    | -4.96                          | 0.168                       |
| CD4 <sup>+</sup> CD28 <sup>-</sup> CD56 <sup>+</sup>  | 2.45                                                      | 15.76                                   | -13.31                         | 0.027                       |
| CD8 <sup>+</sup> CD28 <sup>+</sup> CD56 <sup>-</sup>  | 75.52                                                     | 72.22                                   | 3.30                           | 0.613                       |
| CD8 <sup>+</sup> CD28 <sup>+</sup> CD56 <sup>+</sup>  | 3.99                                                      | 9.12                                    | -5.13                          | 0.231                       |
| CD8 <sup>+</sup> CD28 <sup>-</sup> CD56 <sup>+</sup>  | 1.68                                                      | 1.18                                    | 0.50                           | 0.725                       |

SUPPLEMENTARY TABLE S3. PERIPHERAL BLOOD IMMUNOPHENOTYPING DATA COMPARING 13 IMMUNE CHECKPOINT INHIBITOR-INDUCED THYROIDITIS PATIENTS (N=7 FROM A PREVIOUS STUDY AND N=6 FROM THE CURRENT STUDY) WITH 44 HEALTHY CONTROLS

| <i>Immune cells (cells/<math>\mu</math>L)</i>             | <i>ICI-induced<br/>thyroiditis at<br/>diagnosis (n=13)</i> | <i>Healthy<br/>volunteers<br/>(n=44)</i> | <i>Difference<br/>of means</i> | <i>p-value<br/>(t-test)</i> | <i>Melanoma,<br/>PTC on<br/>pembrolizumab</i> |
|-----------------------------------------------------------|------------------------------------------------------------|------------------------------------------|--------------------------------|-----------------------------|-----------------------------------------------|
| Granulocytes                                              | 2678                                                       | 3076                                     | -398.0                         | 0.240                       | 3184.3                                        |
| Mononuclear cells                                         | 2140.34                                                    | 2108.0                                   | 32.34                          | 0.863                       | 2735.23                                       |
| Lymphocytes (CD14 <sup>-</sup> )                          | 1528                                                       | 1600                                     | -72.33                         | 0.651                       | 2356.72                                       |
| CD3 <sup>+</sup> T lymphocytes                            | 1085                                                       | 1116                                     | -31.18                         | 0.800                       | 1720.71                                       |
| CD19 <sup>+</sup> B lymphocytes                           | 134.2                                                      | 218.8                                    | -84.58                         | 0.036                       | 239.21                                        |
| CD16 <sup>+</sup> CD56 <sup>-</sup> NK cells              | 31.86                                                      | 20.07                                    | 11.79                          | 0.023                       | 22.54                                         |
| CD56 <sup>+</sup> CD16 <sup>+</sup> NK cells              | 160.20                                                     | 147.40                                   | 12.76                          | 0.598                       | 232.99                                        |
| CD56 <sup>+</sup> CD16 <sup>-</sup> NK cells              | 20.31                                                      | 17.98                                    | 2.34                           | 0.639                       | 55.77                                         |
| CD3 <sup>+</sup> CD56 <sup>+</sup> cells                  | 78.92                                                      | 38.39                                    | 40.53                          | 0.003                       | 98.66                                         |
| Lineage negative cells                                    | 95.02                                                      | 78.15                                    | 16.86                          | 0.101                       | 83.65                                         |
| CD4 <sup>+</sup> T lymphocytes                            | 675.70                                                     | 757.30                                   | -81.54                         | 0.422                       | 995.48                                        |
| CD8 <sup>+</sup> T lymphocytes                            | 352.0                                                      | 323.2                                    | 28.79                          | 0.552                       | 678.02                                        |
| CD4 <sup>+</sup> CD8 <sup>+</sup> T lymphocytes           | 16.98                                                      | 10.37                                    | 6.60                           | 0.045                       | 20.79                                         |
| CD4 <sup>-</sup> CD8 <sup>-</sup> T lymphocytes           | 40.16                                                      | 25.20                                    | 14.96                          | 0.012                       | 26.41                                         |
| CD4/CD8 ratio                                             | 2.12                                                       | 2.85                                     | -0.73                          | 0.199                       | 1.47                                          |
| Gamma-delta T lymphocytes                                 | 34.92                                                      | 16.86                                    | 18.06                          | 0.005                       | 23.68                                         |
| Monocytes (CD14 <sup>+</sup> )                            | 612.60                                                     | 506.60                                   | 106.0                          | 0.077                       | 378.52                                        |
| Classical (14 <sup>+</sup> 16 <sup>-</sup> ) monocytes    | 513.10                                                     | 416.20                                   | 96.89                          | 0.058                       | 323.02                                        |
| Intermediate (14 <sup>+</sup> 16 <sup>+</sup> ) monocytes | 59.41                                                      | 37.31                                    | 22.09                          | 0.021                       | 29.57                                         |
| Nonclassical (14lo16 <sup>+</sup> ) monocytes             | 32.91                                                      | 42.15                                    | -9.24                          | 0.093                       | 20.24                                         |
| Neutrophils (15 <sup>+</sup> 16 <sup>+</sup> )            | 2429                                                       | 2880                                     | -451.30                        | 0.162                       | 2922.34                                       |
| Eosinophils (15 <sup>+</sup> 16 <sup>-</sup> )            | 248.20                                                     | 189.80                                   | 58.31                          | 0.341                       | 261.97                                        |

PTC, papillary thyroid carcinoma.
